# Supplementary material for: Heightened aversion to risk and loss in depressed patients with a suicide attempt history
Source: PubMed Central journal article supplement (PMC5593974; doi:10.1038/s41598-017-10541-5), 2017-09-11

## Supplementary Information

# Heightened aversion to risk and loss in depressed patients with a suicide attempt history

Kwangyeol Baek<sup>1,2,§</sup>, Jae-Hyung Kwon<sup>1,§</sup>, Jeong-Ho Chae<sup>3,\*</sup>, Yong An Chung<sup>4</sup>, Jerald D. Kralik<sup>1</sup>, Jung-Ah Min<sup>3</sup>, HyuJung Huh<sup>3</sup>, Kyung Mook Choi<sup>3</sup>, Kuk-In Jang<sup>3</sup>, Na-Bin Lee<sup>3</sup>, Sunyoung Kim<sup>3</sup>, Bradley S. Peterson<sup>5</sup>, and Jaeseung Jeong<sup>1,\*</sup>

<sup>1</sup> Department of Bio and Brain Engineering, Korea Advanced Institute of Science and Technology (KAIST), Daejeon, 305-701, Republic of Korea

<sup>2</sup> Department of Psychiatry, University of Cambridge, Addenbrooke's Hospital, Cambridge CB2 0QQ, United Kingdom

<sup>3</sup> Department of Psychiatry, College of Medicine, The Catholic University of Korea Seoul, 137-701, Republic of Korea

<sup>4</sup> Department of Radiology, College of Medicine, The Catholic University of Korea Seoul, 137-701, Republic of Korea

<sup>5</sup> Institute for the Developing Mind, Children's Hospital Los Angeles and the Keck School of Medicine at the University of Southern California, 90033 United States

§: K.B and J. K contributed equally to this study

**Table S1. Group comparison of risk and loss aversion within depressed patients with respect to current suicide ideation (A) and antidepressant treatment (B).**

**A. Current suicide ideation**

| Behavioral measures, Mean (SD) | Suicide ideation (N = 49) | No ideation (N = 43) | <i>p</i> value <sup>a</sup> |
|--------------------------------|---------------------------|----------------------|-----------------------------|
| Risk aversion                  |                           |                      |                             |
| Gain condition                 | 0.33 (0.29)               | 0.35 (0.28)          | 0.53                        |
| Loss condition                 | -0.03 (0.37)              | 0.03 (0.31)          | 0.95                        |
| Loss aversion                  | 2.71 (2.10)               | 2.72 (2.07)          | 0.97                        |

<sup>a</sup> Two-sample t-test.

**B. Current antidepressant treatment**

| Behavioral measures, Mean (SD) | Medication (N = 50) | No medication (N = 42) | <i>p</i> value <sup>a</sup> |
|--------------------------------|---------------------|------------------------|-----------------------------|
| Risk aversion                  |                     |                        |                             |
| Gain condition                 | 0.33 (0.34)         | 0.35 (0.27)            | 0.83                        |
| Loss condition                 | -0.05 (0.36)        | 0.07 (0.30)            | 0.10                        |
| Loss aversion                  | 2.78 (2.19)         | 2.64 (1.95)            | 0.74                        |

<sup>a</sup> Two-sample t-test.

**Table S2. BOLD activity significantly correlated with the subjective value of probabilistic gain within each group (Risk aversion task).  $p < 0.001$ , uncorrected.**

| <i>Location</i>                        | <i>x</i> | <i>y</i> | <i>z</i> | <i>Cluster extent</i> | <i>t-statistics</i> |
|----------------------------------------|----------|----------|----------|-----------------------|---------------------|
| <b>Healthy controls</b>                |          |          |          |                       |                     |
| R putamen <sup>a</sup>                 | 20       | 2        | 0        | 14                    | 5.43                |
| <b>Nonsuicidal depressed patients</b>  |          |          |          |                       |                     |
| L superior temporal gyrus <sup>b</sup> | -50      | 4        | -10      | 70                    | -10.57              |
| <b>Suicide attempters</b>              |          |          |          |                       |                     |
| R amygdala / uncus <sup>b</sup>        | 30       | 4        | -24      | 19                    | -11.48              |
| R insula <sup>b</sup>                  | 42       | -2       | -8       | 164                   | -10.45              |
| L middle temporal gyrus <sup>b</sup>   | -66      | -12      | -16      | 13                    | -10.24              |
| L temporal pole <sup>b</sup>           | -52      | 14       | -26      | 26                    | -8.85               |
| L insula <sup>b</sup>                  | -46      | -18      | 6        | 37                    | -7.73               |
| L globus pallidus <sup>b</sup>         | -18      | -10      | -6       | 23                    | -7.47               |
| R inferior frontal gyrus <sup>b</sup>  | 24       | 22       | -18      | 18                    | -5.50               |

<sup>a</sup>: Positive correlation

<sup>b</sup>: Negative correlation.

**Table S3. BOLD activity negatively correlated with the subjective value of probabilistic loss within each group (Risk aversion task).  $p < 0.001$ , uncorrected. No positive correlation was found.**

| <b><i>Location</i></b>               | <b><i>x</i></b> | <b><i>y</i></b> | <b><i>z</i></b> | <b><i>Cluste<br/>r<br/>extent</i></b> | <b><i>t-<br/>statisti<br/>cs</i></b> |
|--------------------------------------|-----------------|-----------------|-----------------|---------------------------------------|--------------------------------------|
| <b>Healthy controls</b>              |                 |                 |                 |                                       |                                      |
| R parahippocampal gyrus / cerebellum | 22              | -28             | -26             | 79                                    | -6.87                                |
| Midbrain                             | 0               | -12             | -8              | 23                                    | -4.82                                |
| L thalamus                           | -16             | -10             | -4              | 15                                    | -4.63                                |
| <b>Suicide attempters</b>            |                 |                 |                 |                                       |                                      |
| L insula                             | -44             | -8              | 18              | 28                                    | -8.68                                |

**Table S4. BOLD activity that significantly covaried with the amount of gain in 50-50 gambles within each group (Loss aversion task).  $p < 0.001$ , uncorrected. All positive correlations.**

| <i>Location</i>                                   | <i>x</i> | <i>y</i> | <i>z</i> | <i>Cluster extent</i> | <i>t-statistics</i> |
|---------------------------------------------------|----------|----------|----------|-----------------------|---------------------|
| <b>Healthy controls</b>                           |          |          |          |                       |                     |
| L superior temporal gyrus / parahippocampal gyrus | -36      | 2        | -20      | 79                    | 6.82                |
| R mOFC                                            | 2        | 32       | -22      | 88                    | 6.02                |
| R vmPFC                                           | 8        | 46       | -12      | 59                    | 4.44                |
| R subgenual ACC                                   | 2        | 26       | -6       | 70                    | 5.61                |
| L subgenual ACC                                   | -6       | 52       | -4       | 36                    | 4.55                |
| L PCC/Precuneus                                   | -14      | -62      | 16       | 91                    | 5.22                |
| L cerebellum                                      | -18      | -34      | -22      | 29                    | 5.01                |
| L parahippocampal gyrus                           | -32      | -28      | -20      | 33                    | 4.92                |
| L middle temporal gyrus                           | -52      | -6       | -20      | 28                    | 4.78                |
| <b>Nonsuicidal depressed patients</b>             |          |          |          |                       |                     |
| L Subgenual ACC / ventral striatum                | -8       | 16       | -12      | 20                    | 6.71                |
| L middle temporal gyrus                           | -52      | -12      | -20      | 20                    | 5.70                |
| <b>Suicide attempters</b>                         |          |          |          |                       |                     |
| R precentral / postcentral gyrus                  | 40       | -24      | 62       | 342                   | 7.13                |
| L supplementary motor area                        | -12      | -12      | 58       | 22                    | 6.41                |
| L precentral gyrus                                | -46      | -4       | 48       | 41                    | 5.62                |

**Table S5. BOLD activity that significantly covaried with the amount of loss in 50-50 gambles within each group (Loss aversion task).  $p < 0.001$ , uncorrected. Positive correlation.**

| <i>Location</i>          | <i>x</i> | <i>y</i> | <i>z</i> | <i>Cluste<br/>r<br/>extent</i> | <i>t-<br/>statisti<br/>cs</i> |
|--------------------------|----------|----------|----------|--------------------------------|-------------------------------|
| <b>Healthy controls</b>  |          |          |          |                                |                               |
| L inferior frontal gyrus | -44      | 32       | -4       | 14                             | 3.96                          |

## SI Figures

**Figure S1. Examples of fitting of the discount rate  $k$  with the subjective discount values in probabilistic outcome.** Here are shown the indifference point values across probability levels and the fitting curves from two example data (Blue:  $k = 0.56$ , Red:  $k = 7.05$ ).

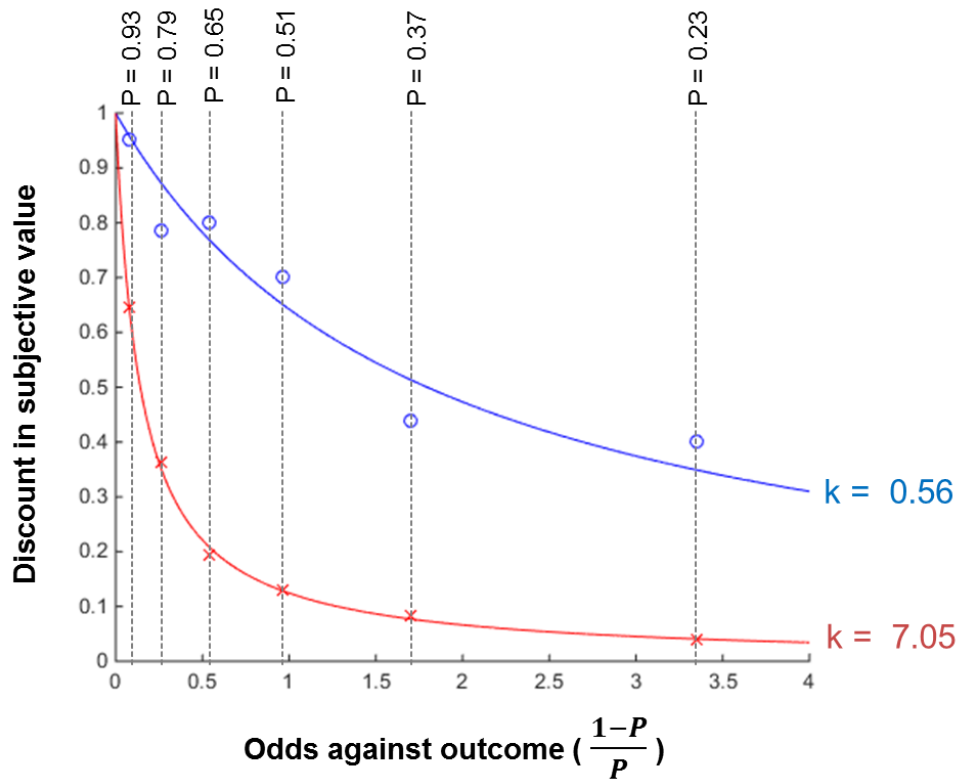

**Figure S2. Distribution of the original discount rates  $k$  and their logarithm values across subjects.** (A) Original discount rates  $k$  exhibited right-skewed distribution. (B) Logarithm values of discount rates  $k$  ( $\log k$ ) were closer to the normal distribution.

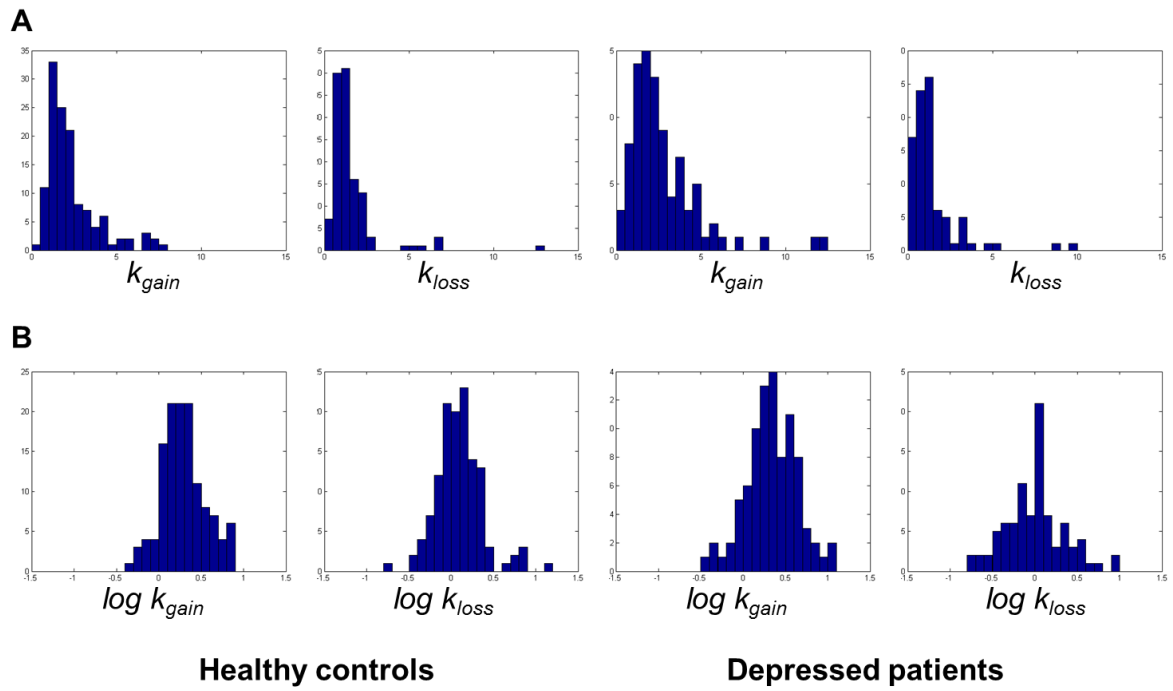

Supplement: 41598_2017_10541_MOESM1_ESM.pdf [file 41598_2017_10541_MOESM1_ESM.pdf]
